# Supplementary material for: Expression Regulation of Polycistronic lee3 Genes of Enterohaemorrhagic Escherichia coli
Source: PubMed Central journal article supplement (PMC4868261; doi:10.1371/journal.pone.0155578), 2016-05-16
Supplement: pone.0155578.s005.pdf [file pone.0155578.s005.pdf]

S1 Table. Primers used and their sequences.

| Name                             | Sequence (5' to 3')                                | Used for                                                             |
|----------------------------------|----------------------------------------------------|----------------------------------------------------------------------|
| <i>NcoI-mpc-F</i>                | CCGCCATGGGAATGAATCTTTTAGTTAAAAG                    | Constructs with <i>mpc</i> as the leading cistron; pQE60- <i>mpc</i> |
| <i>NcoI-<sup>AC</sup>mpc-F</i>   | CCGCCATGGGATGACTGAATCTTTTAGTTAAAAG                 | Constructs with <sup>AC</sup> <i>mpc</i> as the leading cistron      |
| <i>NcoI-escV-F</i>               | CCGCCATGGGAATGAATAAACTCTTAAATATATTTAAA<br>AAAG     | Constructs with <i>escV</i> as the leading cistron                   |
| <i>NcoI-<sup>AC</sup>escV -F</i> | CCGCCATGGGATGACTGAATAAACTCTTAAATATA                | p <sup>AC</sup> V-N, p <sup>AC</sup> V-N-A                           |
| <i>NcoI-escN-F</i>               | CCGCCATGGGAATGATTCAGAGCATGATTCTGTATTG              | pN-A, pN-A-P-Q, and pQE60- <i>escN</i>                               |
| <i>NcoI-<sup>AC</sup>escN-F</i>  | CCGCCATGGGATGACTGATTCAGAGCATGATTCTGTA<br>TTGG      | p <sup>AC</sup> N-A , and p <sup>AC</sup> N-A-P-Q                    |
| <i>NcoI-escA-F</i>               | CCGCCATGGGAATGTTGGACAGAATTTTATCTATTCGT<br>AAAAG    | pA-P, pA-P-Q, and pQE60- <i>escA</i>                                 |
| <i>NcoI-<sup>AC</sup>escA-F</i>  | CCGCCATGGGATGACTGTTGGACAGAATTTTATCTATT<br>CGTAAAAG | p <sup>AC</sup> A-P and p <sup>AC</sup> A-P-Q                        |
| <i>NcoI-escP-F</i>               | CCGCCATGGGATTGACTAGAGTTTCTCTAAAAAGAAA<br>TTTG      | pP-Q and pQE60- <i>escP</i>                                          |
| <i>NcoI-<sup>AC</sup>escP -F</i> | CCGCCATGGGATGACTGACTAGAGTTTCTCTAAAAAG<br>AAATTTG   | p <sup>AC</sup> P-Q                                                  |
| <i>NcoI-sepQ-F</i>               | CCGCCATGGGAATGAAGCCATTGAGTTCACAATTG                | pQ-H                                                                 |
| <i>NcoI-<sup>AC</sup>sepQ -F</i> | CCGCCATGGGATGACTGAAGCCATTGAGTTCACAATT<br>G         | p <sup>AC</sup> Q-H                                                  |
| <i>BglII-mpc-R</i>               | CCGAGATCTTGATGTCATCCTGCGAACGC                      | pQE60- <i>mpc</i>                                                    |
| <i>BglII-escV-R</i>              | CCGAGATCTTGCTCTGAAATCATTTACCG                      | pV, pM-V, and p <sup>AC</sup> M-V                                    |
| <i>BglII-escN-R</i>              | CCGAGATCTGGCAACCACTTTGAATAGG                       | Constructs with <i>escN</i> as the last cistron; pQE60- <i>escN</i>  |
| <i>BglII-escA-R</i>              | CCG AGATCT GTCAAAGTAATGTTCCTTTATGGC                | Constructs with <i>escA</i> as the last cistron, pQE60- <i>escA</i>  |
| <i>BglII-escP-R</i>              | CCGAGATCTATTTTCATATTCAATTGTGAACT                   | pA-P, p <sup>AC</sup> A-P, and pQE60- <i>escP</i>                    |
| <i>BglII-sepQ-R</i>              | CCGAGATCTATCACATACTATGCTAACAGTAAAATAAA<br>AATC     | Constructs with <i>sepQ</i> as the last cistron                      |
| <i>BglII-espH-R</i>              | CCGAGATCTTAATACGCTATAAGAGGAAGCTCTTGTTG             | pQ-H, and p <sup>AC</sup> Q-H                                        |

|                                      |                                                  |                                        |
|--------------------------------------|--------------------------------------------------|----------------------------------------|
| <i>NcoI-mpc</i> <sup>301</sup> -F    | CCGCCATGGGATGAACTTTTCAACAGCATGTGCAG              | <i>p-mpc</i> <sup>Δ1-300</sup> -V-N    |
| <i>NcoI-mpc</i> <sup>251</sup> -F    | CCGCCATGGGATGATGTGCTTAAGTTGTTTGTAAACC            | <i>p-mpc</i> <sup>Δ1-250</sup> -V-N    |
| <i>NcoI-mpc</i> <sup>201</sup> -F    | CCGCCATGGGATGATGAGCGTACGCAGGGAGTG                | <i>p-mpc</i> <sup>Δ1-200</sup> -V-N    |
| <i>NcoI-mpc</i> <sup>151</sup> -F    | CCGCCATGGGATGATTAGAGTATAACGAAAACGCATTT           | <i>p-mpc</i> <sup>Δ1-150</sup> -V-N    |
| <i>NcoI-mpc</i> <sup>101</sup> -F    | CCGCCATGGGATGATTTCTTTTTTTATTGAAATAATTGA<br>T     | <i>p-mpc</i> <sup>Δ1-100</sup> -V-N    |
| <i>NcoI-mpc</i> <sup>51</sup> -F     | CCGCCATGGGATGAAAATGATTTTTATTATTGATAAC<br>C       | <i>p-mpc</i> <sup>Δ1-50</sup> -V-N     |
| <i>NcoI-ATG-mpc</i> <sup>52</sup> -F | CCGCCATGGGAATGAATGATTTTTATTATTGATAACC<br>G       | <i>p-ATG-mpc</i> <sup>Δ1-51</sup> -V-N |
| <i>NcoI-escV</i> <sup>1801</sup> -F  | CCGCCATGGGAGATCGTATCTGAATATCTCACCGGAGC           | <i>p-escV</i> <sup>Δ1-1800</sup> -N-A  |
| <i>NcoI-escV</i> <sup>1601</sup> -F  | CCGCCATGGGATGATGAGAACTATCTTTGAGACGCTTA<br>TTTT   | <i>p-escV</i> <sup>Δ1-1600</sup> -N-A  |
| <i>NcoI-escV</i> <sup>1401</sup> -F  | CCGCCATGGGATGATAAGATAACGTTTTTGCTAAAGAA<br>ACTTG  | <i>p-escV</i> <sup>Δ1-1400</sup> -N-A  |
| <i>NcoI-escV</i> <sup>1201</sup> -F  | CCGCCATGGGATGAGAATTTTTGCTCTATCAAGAGTCA<br>ATATAC | <i>p-escV</i> <sup>Δ1-1200</sup> -N-A  |
| <i>NcoI-escV</i> <sup>1001</sup> -F  | CCGCCATGGGATGAATGCTATGGGAGCTGATTTGTCTA<br>ATAG   | <i>p-escV</i> <sup>Δ1-1000</sup> -N-A  |
| <i>NcoI-escV</i> <sup>801</sup> -F   | CCGCCATGGGATGAAGAAGAAAACCTTGCAGGTGATA<br>TTG     | <i>p-escV</i> <sup>Δ1-800</sup> -N-A   |
| <i>NcoI-escV</i> <sup>601</sup> -F   | CCGCCATGGGATGAGCTGGTATCATTATTGTTTTAGTTA<br>ACC   | <i>p-escV</i> <sup>Δ1-600</sup> -N-A   |
| <i>NcoI-escV</i> <sup>401</sup> -F   | CCGCCATGGGATGAGGGCCGAGCGTGTGCTGAAG               | <i>p-escV</i> <sup>Δ1-400</sup> -N-A   |
| <i>NcoI-escV</i> <sup>201</sup> -F   | CCGCCATGGGATGATTCTTTCCCAATCCTGTTG                | <i>p-escV</i> <sup>Δ1-200</sup> -N-A   |
| <i>mpc</i> -RT-F                     | AGAAACGTTGAAGAGTTTTTAAGATTATTGGG                 | Detection of <i>mpc</i> RNA            |
| <i>mpc</i> -RT-R                     | CTGCACATGCTGTTGAAAAGTATTCATTAG                   | Detection of <i>mpc</i> RNA            |
| <i>mpc'</i> -RT-F                    | GGAAATGATTTTTATTATTATTGATAACCGTGTG               | Detection of <i>mpc</i> RNA            |
| <i>mpc'</i> -RT-R                    | AAGCACAATTTATTATCGTAGACAAAAATATGTTC              | Detection of <i>mpc</i> RNA            |
| <i>escV</i> -RT-F                    | GGTCATGCGTTGGAATTTCT                             | Detection of <i>escV</i> RNA           |
| <i>escV</i> -RT-R                    | AAGGTGAGCGAGCTGTTG                               | Detection of <i>escV</i> RNA           |
| <i>escV'</i> -RT-F                   | ACGTTTCGTATTGCCCTGCGTC                           | Detection of <i>escV</i> RNA           |
| <i>escV'</i> -RT-R                   | AAAGAGAGCACGGGGACTGACG                           | Detection of <i>escV</i> RNA           |
| <i>escN</i> -RT-F                    | TCGGCGGGACGATTATTAAGGC                           | Detection of <i>escN</i> RNA           |
| <i>escN</i> -RT-R                    | GCTGCCCAATACCGCAAGTTAGTAG                        | Detection of <i>escN</i> RNA           |
| <i>escA</i> -RT-F                    | AGCAGAGCGAACCGATTGAGAGAATC                       | Detection of <i>escA</i> RNA           |
| <i>escA</i> -RT-R                    | TGTGAATCTAGCAATGAACGCTTTTCC                      | Detection of <i>escA</i> RNA           |

|                           |                                              |                                                         |
|---------------------------|----------------------------------------------|---------------------------------------------------------|
| <i>escP</i> -RT-F         | TGGCTTCTTTATGGAAGAGATTGTTTTACT               | Detection of <i>escP</i> RNA                            |
| <i>escP</i> -RT-R         | AATTGTGAACTCAATGGCTTCATCA                    | Detection of <i>escP</i> RNA                            |
| <i>sepQ</i> -RT-F         | TCTGGCTGCGGATCTGTTAT                         | Detection of <i>sepQ</i> RNA                            |
| <i>sepQ</i> -RT-R         | CTCCCGTATGCTATCGTCGT                         | Detection of <i>sepQ</i> RNA                            |
| <i>sepQ'</i> -RT-F        | TGCCGTTGTTGCCAGTTATCGG                       | Detection of <i>sepQ</i> RNA                            |
| <i>sepQ'</i> -RT-F        | ACCTTCCGGTAAGGCAGTCTGCA                      | Detection of <i>sepQ</i> RNA                            |
| <i>espH</i> -RT-F         | CAAGTGAACATGCGTCATGGAACA                     | Detection of <i>espH</i> RNA                            |
| <i>espH</i> -RT-R         | TCTTTCAGCTAAGATCCCCTCAGG                     | Detection of <i>espH</i> RNA                            |
| <i>bla</i> -RT-F          | CATTTCCGTGTCGCCCTTATTC                       | Detection of $\beta$ -lactamase RNA                     |
| <i>bla</i> -RT-R          | GGCGTCAACACGGGATAATACC                       | Detection of $\beta$ -lactamase RNA                     |
| <i>mpc</i> -G72stop-F     | GCTCCTGAGCGTACGCAGTGATGATTGAACATATT<br>TTTG  | pM <sup>G72stop</sup> -V-N                              |
| <i>mpc</i> -G72stop-R     | CAAAAATATGTTCAATCACTCACTGCGTACGCTCA<br>GGAGC | pM <sup>G72stop</sup> -V-N                              |
| RBS-F                     | AAGCTTTGAGCGGATAACAATTTAC                    | pM <sup>G72stop</sup> -V-N                              |
| pACYC177-R                | CAAGATCCTGGTATCGGTCTGCG                      | pM <sup>G72stop</sup> -V-N                              |
| <i>mpc-trunc51-100</i> -F | TTTCTTTTTTTATTGAAATAATTGATAATAATG            | p- <i>mpc</i> <sup><math>\Delta</math>51-100</sup> -V-N |
| <i>mpc-trunc51-100</i> -R | CCCAATAATCTTAAAACTCTTCAACG                   | p- <i>mpc</i> <sup><math>\Delta</math>51-100</sup> -V-N |
